# Supplementary material for: Proteomic Analysis of Neisseria gonorrhoeae Biofilms Shows Shift to Anaerobic Respiration and Changes in Nutrient Transport and Outermembrane Proteins
Source: PubMed Central journal article supplement (PMC3368942; doi:10.1371/journal.pone.0038303), 2012-06-06
Supplement: pone.0038303.s001.pdf [file pone.0038303.s001.pdf]

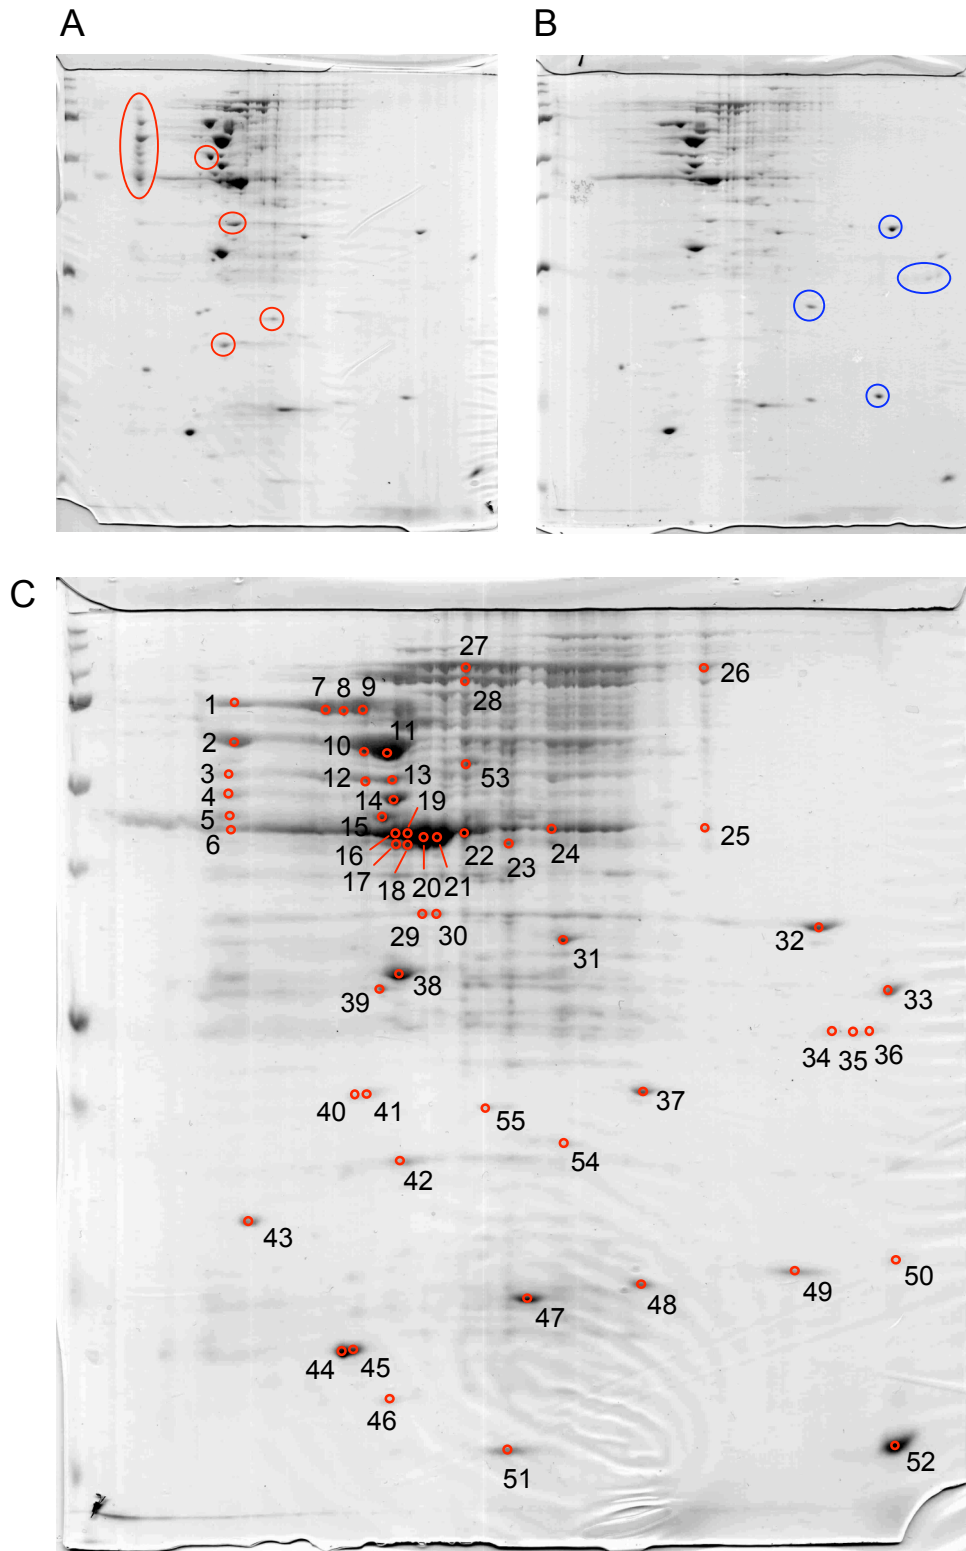

Supplementary Figure S1. 2D SDS-PAGE gels of soluble proteins (Extract 1) from (A) planktonic organisms, (B) biofilm organisms, and (C) planktonic + biofilm organisms. Circled protein spots in panels A and B show visible intensity differences between the two gels. Fifty five spots were excised from the mixed gel in panel C as indicated.
