# Supplementary material for: Proteomic Analysis of Neisseria gonorrhoeae Biofilms Shows Shift to Anaerobic Respiration and Changes in Nutrient Transport and Outermembrane Proteins
Source: PubMed Central journal article supplement (PMC3368942; doi:10.1371/journal.pone.0038303), 2012-06-06
Supplement: pone.0038303.s004.pdf [file pone.0038303.s004.pdf]

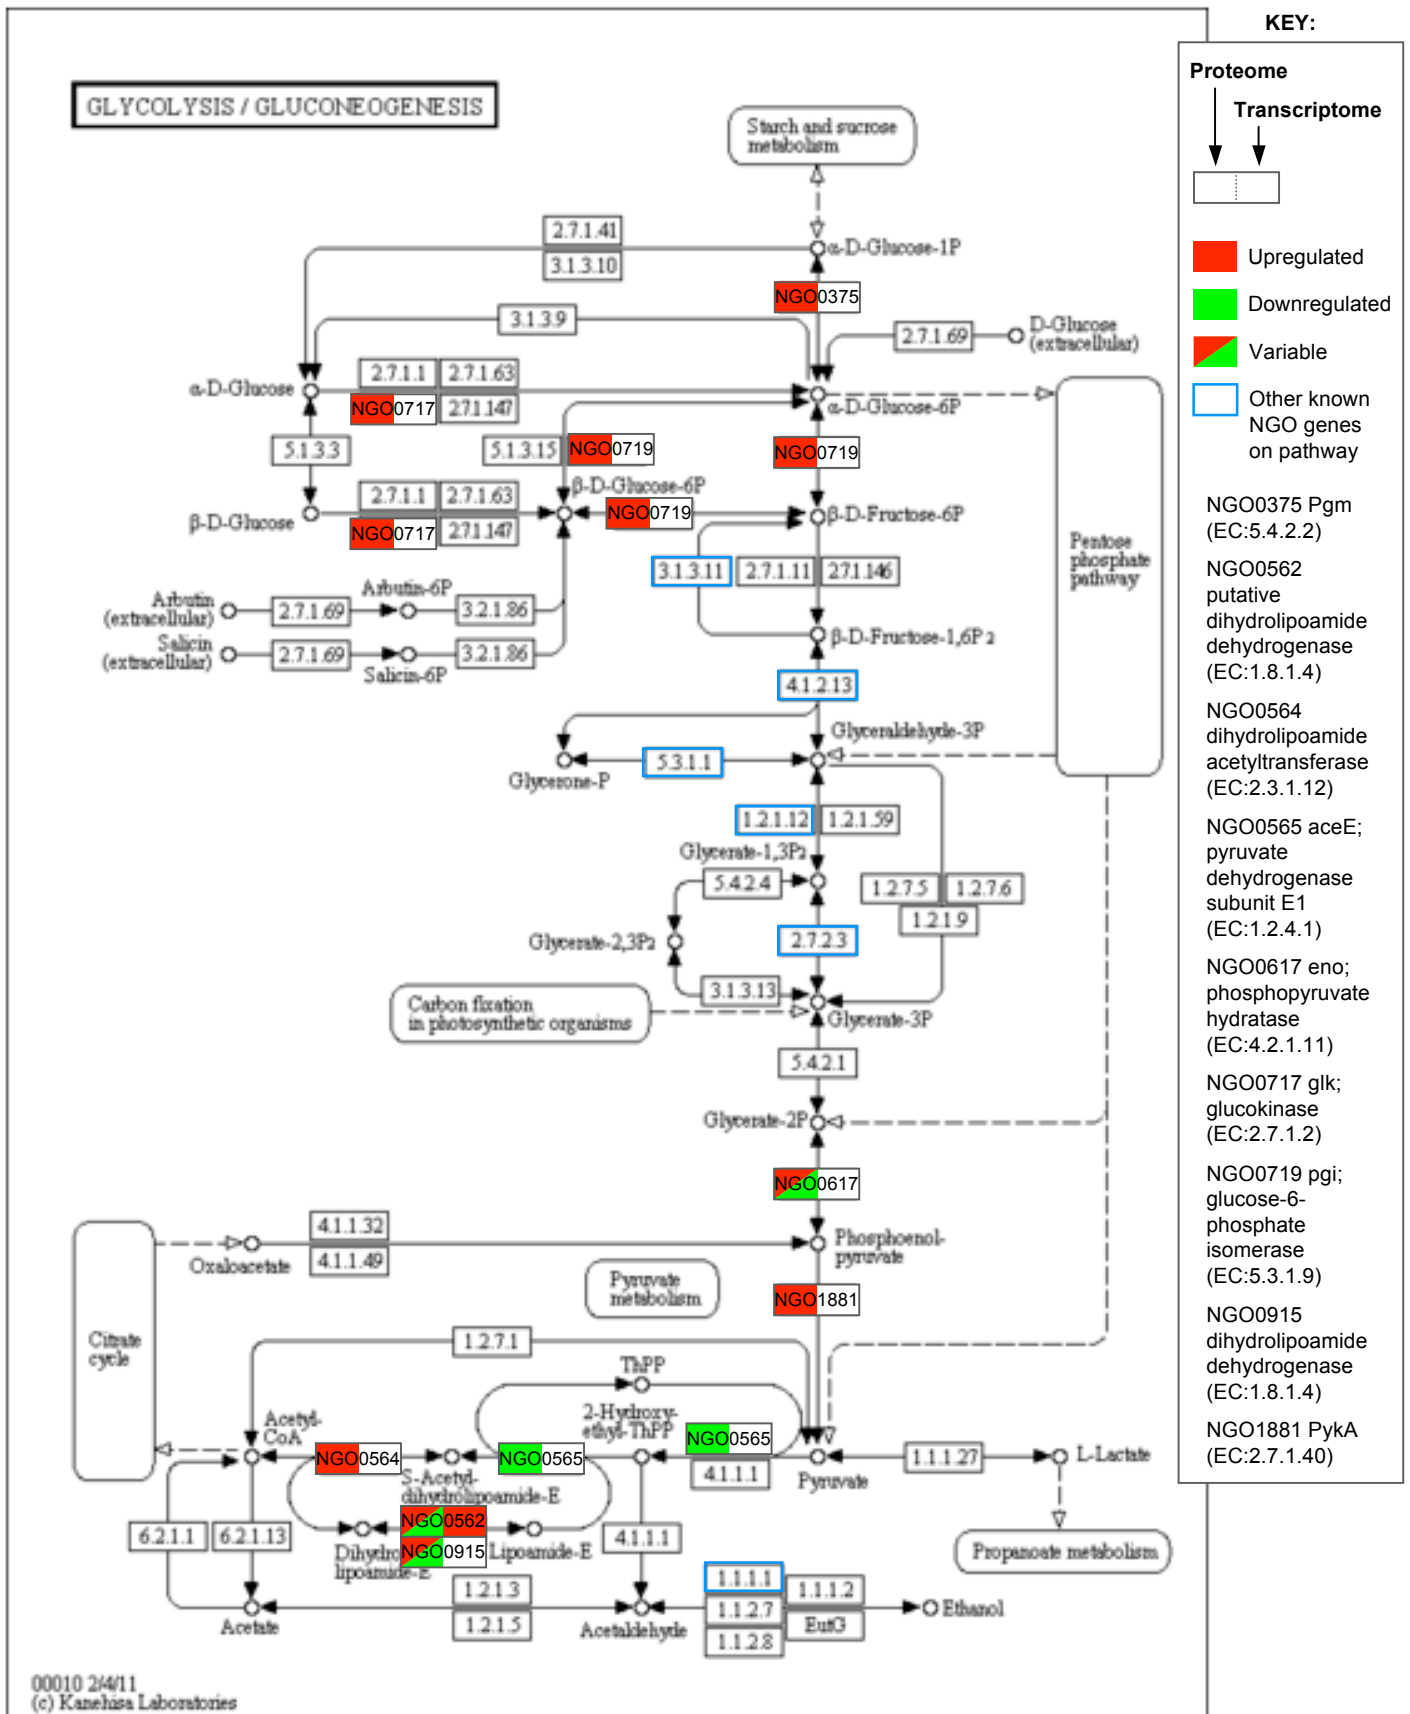

Supplementary Figure S4. KEGG pathway for glycolysis/gluconeogenesis.
