# Supplementary material for: Proteomic Analysis of Neisseria gonorrhoeae Biofilms Shows Shift to Anaerobic Respiration and Changes in Nutrient Transport and Outermembrane Proteins
Source: PubMed Central journal article supplement (PMC3368942; doi:10.1371/journal.pone.0038303), 2012-06-06
Supplement: pone.0038303.s005.pdf [file pone.0038303.s005.pdf]

**Supplementary Table S1. Differentially expressed proteins detected in the preliminary 2D SDS-PAGE study, all with p-values <0.05.<sup>a</sup>**

| gel spot(s)                     | Accession | Name                                           | # peptides | log <sub>2</sub> |                  | p-value  |
|---------------------------------|-----------|------------------------------------------------|------------|------------------|------------------|----------|
|                                 |           |                                                | (95% conf) | L:H <sup>b</sup> | L:H <sup>c</sup> | L:H      |
| <b>Upregulated in biofilm</b>   |           |                                                |            |                  |                  |          |
| 34 <sup>d</sup>                 | NGO0574   | Cah; carbonic anhydrase                        | 14         | 5.203            | 2.379            | 0.03179  |
| 32                              | NGO1812   | major outer membrane protein porin P.IB        | 25         | 1.871            | 0.904            | 0.00065  |
| 7                               | NGO0562   | putative dihydrolipoamide dehydrogenase        | 11         | 1.526            | 0.610            | 0.00082  |
| 48                              | NGO18311  | RplP; 50S ribosomal protein L16                | 3          | 1.385            | 0.470            | 0.00404  |
| 18, 19, 20                      | NGO0916   | dihydrolipoamide succinyltransferase           | 6          | 1.352            | 0.435            | 0.00359  |
| 5, 15                           | NGO0617   | Eno; phosphopyruvate hydratase                 | 34         | 1.341            | 0.424            | 0.00985  |
| 47                              | NGO0171   | RplS; 50S ribosomal protein L19                | 1          | 1.261            | 0.335            | 0.04409  |
| 23                              | NGO1919   | Pgk; phosphoglycerate kinase                   | 36         | 1.227            | 0.295            | 0.00263  |
| <b>Downregulated in biofilm</b> |           |                                                |            |                  |                  |          |
| 55                              | NGO0108   | hypothetical protein                           | 14         | 0.512            | -0.965           | 0.03702  |
| 42                              | NGO1871   | Def; peptide deformylase                       | 6          | 0.578            | -0.790           | 0.00531  |
| 42                              | NGO0376   | putative peptidyl-prolyl cis-trans isomerase B | 16         | 0.703            | -0.508           | 0.01966  |
| 47                              | NGO2094   | GroES; co-chaperonin GroES                     | 18         | 0.733            | -0.449           | 4.79E-05 |
| 18, 23                          | NGO0913   | SucC; succinyl-CoA synthetase subunit beta     | 30         | 0.750            | -0.414           | 0.03648  |
| 22                              | NGO0977   | acetate kinase                                 | 19         | 0.807            | -0.310           | 0.00077  |
| 23                              | NGO1901   | chaperone protein DnaJ                         | 4          | 0.900            | -0.152           | 0.04698  |

<sup>a</sup> In this preliminary study, MS files were searched and quantified using ProteinPilot 3.0 (revision 114732) running the Paragon Algorithm 3.0.0.0, 113442.

<sup>b</sup> Raw light to heavy (L:H) ratios reflecting biofilm to planktonic protein ratios.

<sup>c</sup> L:H ratios converted to log<sub>2</sub> values.

<sup>d</sup> Carbonic anhydrase was also detected in gel spots 35 and 36 by MALDI-TOF MS.
