# Supplementary material for: Proteomic Analysis of Neisseria gonorrhoeae Biofilms Shows Shift to Anaerobic Respiration and Changes in Nutrient Transport and Outermembrane Proteins
Source: PubMed Central journal article supplement (PMC3368942; doi:10.1371/journal.pone.0038303), 2012-06-06
Supplement: pone.0038303.s009.pdf [file pone.0038303.s009.pdf]

**Supplementary Table S5. Upregulated proteins in *N. gonorrhoeae* biofilms listed by functional roles<sup>a</sup>: Biofilm/Planktonic ratios expressed as log<sub>2</sub> values, 1.5-fold cutoff threshold (log<sub>2</sub> values ≥ 0.585), p-values <0.05)**

| Accession                                                         | Name                                                                              | JCVI sub-role                                                                   | Extract 1<br>Avg <sup>b</sup> (N) <sup>c</sup> | Extract 2<br>Avg <sup>b</sup> (N) <sup>c</sup> | Extract 3<br>Avg <sup>b</sup> (N) <sup>c</sup> |
|-------------------------------------------------------------------|-----------------------------------------------------------------------------------|---------------------------------------------------------------------------------|------------------------------------------------|------------------------------------------------|------------------------------------------------|
| <b>Amino acid biosynthesis</b>                                    |                                                                                   |                                                                                 |                                                |                                                |                                                |
| NGO1242                                                           | HisB; imidazoleglycerol-phosphate dehydratase                                     | Histidine family                                                                | 1.331 (1)                                      |                                                |                                                |
| NGO0340                                                           | putative cysteine synthase/cystathionine beta-synthase                            | Serine family                                                                   |                                                | 1.378 (3)                                      | 0.816 (1)                                      |
| NGO0674                                                           | 3-isopropylmalate dehydrogenase                                                   | Pyruvate family                                                                 |                                                | 0.674 (2)                                      |                                                |
| <b>Biosynthesis of cofactors, prosthetic groups, and carriers</b> |                                                                                   |                                                                                 |                                                |                                                |                                                |
| NGO1217                                                           | glutathione synthetase                                                            | Glutathione and analogs                                                         |                                                | 0.959 (2)                                      |                                                |
| <b>Cell envelope</b>                                              |                                                                                   |                                                                                 |                                                |                                                |                                                |
| NGO1513                                                           | OpaD                                                                              | Other                                                                           | 2.018 (2)                                      | 1.552 (2)                                      | 2.549 (2)                                      |
| NGO0055                                                           | pilus-associated protein                                                          | Surface structures                                                              | 0.806 (2)                                      | 1.324 (1)                                      |                                                |
| NGO1577                                                           | Omp3                                                                              | Other                                                                           | 0.656 (3)                                      |                                                | 0.857 (3)                                      |
| NGO1669                                                           | PilG; type IV pilus assembly protein PilC                                         | Surface structures                                                              |                                                | 1.276 (1)                                      | 0.644 (2)                                      |
| NGO0233                                                           | outer membrane protein                                                            | Other                                                                           |                                                | 1.038 (2)                                      | 1.093 (3)                                      |
| NGO1873 <sup>e</sup>                                              | hypothetical protein                                                              | Biosynthesis and degradation of surface polysaccharides and lipopolysaccharides |                                                | 0.757 (3)                                      | 0.870 (3)                                      |
| NGO1802                                                           | hypothetical protein; outer membrane protein                                      | Other                                                                           |                                                | 0.665 (1)                                      |                                                |
| NGO0070                                                           | outer membrane opacity protein B                                                  | Other                                                                           |                                                |                                                | 2.379 (1)                                      |
| NGO1949 <sup>f</sup>                                              | hypothetical protein                                                              | Other                                                                           |                                                |                                                | 1.739 (1)                                      |
| NGO0948 <sup>g</sup>                                              | hypothetical protein; lipoprotein-34                                              | Other                                                                           |                                                |                                                | 1.222 (3)                                      |
| NGO1801                                                           | hypothetical protein                                                              | Other                                                                           |                                                |                                                | 1.199 (1)                                      |
| NGO0094 <sup>d</sup>                                              | hypothetical protein; type IV pilus assembly protein PilQ                         | Surface structures                                                              |                                                |                                                | 1.098 (3)                                      |
| NGO1251 <sup>h</sup>                                              | hypothetical protein                                                              | Other                                                                           |                                                |                                                | 1.045 (1)                                      |
| <b>Cellular processes</b>                                         |                                                                                   |                                                                                 |                                                |                                                |                                                |
| NGO1225                                                           | putative peptidyl-prolyl isomerase                                                | Pathogenesis                                                                    | 1.387 (1)                                      |                                                |                                                |
| NGO1767                                                           | KatA; catalase                                                                    | Detoxification                                                                  | 0.954 (3)                                      |                                                |                                                |
| NGO1382                                                           | putative GTP pyrophosphokinase                                                    | Adaptations to atypical conditions                                              |                                                | 1.348 (1)                                      |                                                |
| NGO1363 <sup>d</sup>                                              | hypothetical protein                                                              | Detoxification                                                                  |                                                | 0.643 (1)                                      | 0.774 (2)                                      |
| NGO0382                                                           | hypothetical protein; cell division protease Ftsh                                 | Cell division                                                                   |                                                |                                                | 1.071 (1)                                      |
| NGO0277                                                           | ComL; putative lipoprotein                                                        | DNA transformation                                                              |                                                |                                                | 1.031 (2)                                      |
| NGO2119 <sup>d</sup>                                              | hypothetical protein; putative toluene tolerance protein                          | Toxin production and resistance                                                 |                                                |                                                | 0.743 (1)                                      |
| <b>Central intermediary metabolism</b>                            |                                                                                   |                                                                                 |                                                |                                                |                                                |
| NGO1276                                                           | AniA; nitrite reductase (NO-forming)                                              | Nitrogen metabolism                                                             | 3.485 (1)                                      | 3.175 (1)                                      | 1.742 (1)                                      |
| NGO0574                                                           | Cah; carbonic anhydrase                                                           | Other                                                                           | 1.525 (3)                                      | 0.668 (2)                                      |                                                |
| <b>DNA metabolism</b>                                             |                                                                                   |                                                                                 |                                                |                                                |                                                |
| NGO1031                                                           | putative single-stranded DNA binding protein                                      | DNA replication, recombination, and repair                                      | 0.778 (1)                                      |                                                |                                                |
| NGO1863                                                           | DNA topoisomerase I                                                               | DNA replication, recombination, and repair                                      | 0.621 (1)                                      |                                                |                                                |
| NGO0423                                                           | RdgC; recombination associated protein                                            | DNA replication, recombination, and repair                                      | 0.617 (1)                                      |                                                |                                                |
| <b>Energy metabolism</b>                                          |                                                                                   |                                                                                 |                                                |                                                |                                                |
| NGO1769                                                           | CcpR; cytochrome c peroxidase                                                     | Electron transport                                                              | 3.271 (1)                                      | 1.547 (2)                                      |                                                |
| NGO0564                                                           | dihydro-lipoamide acetyltransferase                                               | Pyruvate dehydrogenase                                                          | 1.724 (3)                                      |                                                |                                                |
| NGO1812 <sup>d</sup>                                              | major outer membrane protein porin P.IB                                           | Electron transport                                                              | 1.669 (3)                                      | 0.908 (3)                                      | 0.697 (3)                                      |
| NGO2146                                                           | FOF1 ATP synthase subunit B; F-type H <sup>+</sup> -transporting ATPase subunit b | ATP-proton motive force interconversion                                         | 1.637 (2)                                      | 0.717 (2)                                      | 0.593 (3)                                      |
| NGO0906                                                           | hypothetical protein                                                              | Electron transport                                                              | 1.073 (1)                                      | 0.614 (1)                                      |                                                |
| NGO0717                                                           | Glk; glucokinase                                                                  | Glycolysis/gluconeogenesis                                                      | 0.781 (3)                                      |                                                |                                                |
| NGO0719                                                           | Pgi; glucose-6-phosphate isomerase                                                | Glycolysis/gluconeogenesis                                                      | 0.765 (2)                                      |                                                |                                                |
| NGO1881                                                           | PykA; pyruvate kinase                                                             | Glycolysis/gluconeogenesis                                                      | 0.644 (1)                                      |                                                |                                                |
| NGO0920                                                           | SdhB; succinate dehydrogenase iron-sulfur subunit                                 | TCA cycle                                                                       | 0.609 (1)                                      |                                                |                                                |
| NGO1373                                                           | cbb3-type cytochrome c oxidase subunit II                                         | Electron transport                                                              |                                                | 1.479 (1)                                      | 1.930 (1)                                      |
| NGO0375                                                           | Pgm; phosphoglucomutase                                                           | Sugars                                                                          |                                                | 1.368 (1)                                      |                                                |
| NGO0718 <sup>d</sup>                                              | RpiR family transcriptional regulator                                             | Glycolysis/gluconeogenesis                                                      |                                                | 1.217 (1)                                      |                                                |
| NGO0214                                                           | putative phosphotransacetylase                                                    | Fermentation                                                                    |                                                | 1.177 (2)                                      |                                                |
| NGO1328                                                           | putative cytochrome                                                               | Electron transport                                                              |                                                | 1.152 (1)                                      |                                                |
| NGO1610                                                           | transaldolase                                                                     | Pentose phosphate pathway                                                       |                                                | 0.718 (1)                                      |                                                |
| NGO1080                                                           | putative C-type cytochrome                                                        | Electron transport                                                              |                                                | 0.627 (1)                                      |                                                |

|                                                      |                                                                                        |                                                      |           |           |           |
|------------------------------------------------------|----------------------------------------------------------------------------------------|------------------------------------------------------|-----------|-----------|-----------|
| NGO1371                                              | CcoP; cb-type cytochrome c oxidase subunit III                                         | Electron transport                                   |           |           | 1.602 (3) |
| NGO1985 <sup>i</sup>                                 | hypothetical protein                                                                   | Electron transport                                   |           |           | 1.351 (3) |
| NGO1470                                              | PntA; NAD(P) transhydrogenase subunit alpha                                            | Electron transport                                   |           |           | 1.293 (1) |
| NGO1584 <sup>j</sup>                                 | MafA3; putative adhesin                                                                | Electron transport                                   |           |           | 1.255 (2) |
| NGO2031                                              | PetC; ubiquinol-cytochrome c reductase cytochrome c1 subunit                           | Electron transport                                   |           |           | 1.233 (3) |
| NGO1972 <sup>k</sup>                                 | MafA4; putative adhesin                                                                | Electron transport                                   |           |           | 0.773 (2) |
| <b>Fatty acid and phospholipid metabolism</b>        |                                                                                        |                                                      |           |           |           |
| NGO1206 <sup>l</sup>                                 | phosphatidylserine decarboxylase                                                       | Biosynthesis                                         |           |           | 0.713 (2) |
| <b>Mobile and extrachromosomal element functions</b> |                                                                                        |                                                      |           |           |           |
| NGO0523                                              | putative phage associated protein                                                      | Prophage functions                                   |           |           | 1.161 (1) |
| <b>Protein fate</b>                                  |                                                                                        |                                                      |           |           |           |
| NGO0845                                              | hypothetical protein                                                                   | Degradation of proteins, peptides, and glycopeptides | 0.957 (2) |           |           |
| NGO1901                                              | chaperone protein DnaJ                                                                 | Protein folding and stabilization                    | 0.734 (1) |           |           |
| NGO0399                                              | heat shock protein HtpX                                                                | Protein folding and stabilization                    |           | 1.668 (1) | 1.683 (1) |
| NGO1081                                              | alpha-2,3-sialyltransferase                                                            | Protein modification and repair                      |           |           | 0.668 (1) |
| <b>Protein synthesis</b>                             |                                                                                        |                                                      |           |           |           |
| NGO1844                                              | 30S ribosomal protein S7                                                               | Ribosomal proteins: synthesis and modification       | 1.219 (1) |           |           |
| NGO1832                                              | RpsC; 30S ribosomal protein S3                                                         | Ribosomal proteins: synthesis and modification       |           | 1.325 (3) |           |
| NGO1845                                              | RpsL; 30S ribosomal protein S12                                                        | Ribosomal proteins: synthesis and modification       |           | 0.893 (1) |           |
| NGO1858                                              | Tuf; elongation factor Tu                                                              | Translation factors                                  |           | 0.801 (2) |           |
| NGO1830 <sup>m</sup>                                 | RpsQ; 30S ribosomal protein S17                                                        | Ribosomal proteins: synthesis and modification       |           |           | 1.120 (3) |
| NGO1826 <sup>n</sup>                                 | RpsH; 30S ribosomal protein S8                                                         | Ribosomal proteins: synthesis and modification       |           |           | 0.904 (2) |
| <b>Regulatory functions</b>                          |                                                                                        |                                                      |           |           |           |
| NGO0326 <sup>o</sup>                                 | hypothetical protein; host factor-I protein                                            | Other                                                | 0.631 (2) |           |           |
| <b>Transcription</b>                                 |                                                                                        |                                                      |           |           |           |
| NGO1285                                              | NusA; transcription elongation factor NusA                                             | Transcription factors                                |           | 0.804 (1) |           |
| <b>Transport and binding proteins</b>                |                                                                                        |                                                      |           |           |           |
| NGO0206                                              | putative ABC transporter, periplasmic binding protein, polyamine                       | Amino acids, peptides and amines                     | 1.217 (1) |           |           |
| NGO0372                                              | putative ABC transporter, periplasmic binding protein, amino acid                      | Cations and iron carrying compounds                  | 1.109 (1) |           | 0.609 (1) |
| NGO0794                                              | BfrA; bacterioferritin                                                                 | Cations and iron carrying compounds                  | 1.090 (2) |           |           |
| NGO2139                                              | hypothetical protein; D-methionine transport system substrate-binding protein          | Carbohydrates, organic alcohols, and acids           | 0.693 (1) |           |           |
| NGO0455                                              | hypothetical protein; type IV pilus assembly protein PilX                              | Unknown substrate                                    |           |           | 1.784 (1) |
| NGO1205                                              | putative TonB-dependent receptor protein; iron complex outer membrane receptor protein | Cations and iron carrying compounds                  |           |           | 1.530 (2) |
| <b>Hypothetical proteins</b>                         |                                                                                        |                                                      |           |           |           |
| NGO0905                                              | hypothetical protein                                                                   | Conserved                                            | 0.783 (2) | 0.643 (1) |           |
| NGO0236                                              | hypothetical protein                                                                   | Conserved                                            |           |           | 1.344 (1) |

<sup>a</sup> Functional role assignments (both main and JCVI sub-roles) for the *N. gonorrhoeae* proteins were downloaded from the JCVI-CMR website (<http://cmr.jcvi.org/tigr-scripts/CMR/CmrHomePage.cgi>).

<sup>b</sup> Average log<sub>2</sub> values for biofilm/planktonic protein ratios. Values given in red meet the 2-fold cutoff threshold (log<sub>2</sub> values ≥ 1.000).

<sup>c</sup> (N) represents the number of measurements (biological replicates) averaged.

<sup>d</sup> Proteins with more than one functional role assignment provided (alternate Main role/JCVI sub-role): NGO0094, Cellular processes/DNA transformation, Cellular processes/Pathogenesis; NGO1363, Transport and binding proteins/Other; NGO2119, Cellular processes/Detoxification; NGO1812, Energy metabolism/Fermentation; NGO0718, Energy metabolism/Sugars.

<sup>e</sup> NGO1873 tentatively reclassified based on orthology to *N. meningitidis* NMB0109 (90.4% identity), NMC0101 (89.8% identity), and NMCC\_2040 (89.3% identity).

<sup>f</sup> NGO1949 tentatively reclassified based on orthology to *N. meningitidis* NMC2118 (96.0% identity) and NMCC\_2098 (96.0% identity).

<sup>g</sup> NGO0948 tentatively reclassified based on orthology to *N. meningitidis* NMB0928 (97.2% identity), NMC0906 (96.5% identity), NMCC\_0871 (97.3% identity), and NMA1123 (97.3% identity).

<sup>h</sup> NGO1251 tentatively reclassified based on orthology to *N. meningitidis* NMB1592 (95.7% identity).

<sup>i</sup> NGO1985 tentatively reclassified based on orthology to *N. meningitidis* NMA0339 (97.5% identity). Possible alternate Main role/JCVI sub-role assignments for this protein include: Cell envelope/Other (NMCC\_2056, 95.5% identity; and NMC2071, 95.5% identity) and Cellular processes/Toxin production and resistance (NMB2091, 95.5% identity).

<sup>j</sup> NGO1584 tentatively reclassified based on orthology to *N. meningitidis* NMA2112 (98.4% identity). Possible alternate Main role/JCVI sub-role assignments for this protein include: Regulatory functions/Other (NMA2112), Protein Synthesis/Ribosomal proteins: synthesis and modification (NMA2112), Cell envelope/Surface structures (NMC0596, 97.8% identity), and Cellular processes/Pathogenesis (NMC0596, 97.8% identity).

<sup>k</sup> NGO1972 tentatively reclassified based on orthology to *N. meningitidis* NMA0325 (98.8% identity). Possible alternate Main role/JCVI sub-role assignments for this protein include: Regulatory functions/Other (NMA0325), Protein Synthesis/Ribosomal proteins: synthesis and modification (NMA0325), and Cellular processes/Pathogenesis (NMC2083, 98.4% identity).

<sup>l</sup> NGO1206 tentatively reclassified based on orthology to *N. meningitidis* NMA1160 (93.2% identity).

<sup>m</sup> NGO1830 tentatively reclassified based on orthology to *N. meningitidis* NMCC\_1996 (98.9% identity), NMC0141 (98.9% identity), and NMB0151 (98.9% identity).

<sup>n</sup> NGO1826 tentatively reclassified based on orthology to *N. meningitidis* NMC0146 (100% identity) and NMB0156 (100% identity).

<sup>o</sup> NGO0326 tentatively reclassified based on orthology to *N. meningitidis* NMB0784 (97.9% identity). Possible alternate Main role/JCVI sub-role assignments for this protein include: Mobile and extrachromosomal element functions/Prophage functions (NMB0784).
