# Supplementary material for: Proteomic Analysis of Neisseria gonorrhoeae Biofilms Shows Shift to Anaerobic Respiration and Changes in Nutrient Transport and Outermembrane Proteins
Source: PubMed Central journal article supplement (PMC3368942; doi:10.1371/journal.pone.0038303), 2012-06-06
Supplement: pone.0038303.s010.pdf [file pone.0038303.s010.pdf]

**Supplementary Table S6. Downregulated proteins in *N. gonorrhoeae* biofilms listed by functional roles<sup>a</sup>: Biofilm/Planktonic ratios expressed as log<sub>2</sub> values, 1.5-fold cutoff threshold (log<sub>2</sub> values ≤ -0.585), p-values <0.05)**

| Accession                                                         | Name                                                                                              | JCVI sub-role                                                                   | Extract 1<br>Avg <sup>b</sup> (N) <sup>c</sup> | Extract 2<br>Avg <sup>b</sup> (N) <sup>c</sup> | Extract 3<br>Avg <sup>b</sup> (N) <sup>c</sup> |
|-------------------------------------------------------------------|---------------------------------------------------------------------------------------------------|---------------------------------------------------------------------------------|------------------------------------------------|------------------------------------------------|------------------------------------------------|
| <b>Amino acid biosynthesis</b>                                    |                                                                                                   |                                                                                 |                                                |                                                |                                                |
| NGO0212                                                           | 1-(5-phosphoribosyl)-5-[(5-phosphoribosylamino)methylideneamino]imidazole-4-carboxamide isomerase | Histidine family                                                                | -0.623 (1)                                     |                                                |                                                |
| NGO0947                                                           | DapA; dihydrodipicolinate synthase                                                                | Aspartate family                                                                |                                                | -1.901 (1)                                     |                                                |
| NGO1961                                                           | argininosuccinate synthase                                                                        | Glutamate family                                                                |                                                | -1.643 (1)                                     |                                                |
| NGO0397                                                           | HisZ; ATP phosphoribosyltransferase regulatory subunit                                            | Histidine family                                                                |                                                | -1.320 (1)                                     |                                                |
| <b>Biosynthesis of cofactors, prosthetic groups, and carriers</b> |                                                                                                   |                                                                                 |                                                |                                                |                                                |
| NGO0704                                                           | bifunctional 3,4-dihydroxy-2-butanone 4-phosphate synthase/GTP cyclohydrolase II-like protein     | Riboflavin, FMN, and FAD                                                        | -1.100 (1)                                     |                                                |                                                |
| NGO1684                                                           | 7-cyano-7-deazaguanine reductase                                                                  | Folic acid                                                                      |                                                | -1.210 (1)                                     |                                                |
| <b>Cell envelope</b>                                              |                                                                                                   |                                                                                 |                                                |                                                |                                                |
| NGO0403                                                           | ADP-L-glycero-D-mannoheptose epimerase                                                            | Biosynthesis and degradation of surface polysaccharides and lipopolysaccharides |                                                | -0.986 (1)                                     |                                                |
| NGO0346 <sup>d</sup>                                              | putative twitching motility-like protein; twitching motility protein PilU                         | Surface structures                                                              |                                                | -0.931 (2)                                     |                                                |
| <b>Cellular processes</b>                                         |                                                                                                   |                                                                                 |                                                |                                                |                                                |
| NGO1909                                                           | putative twitching motility - like protein; twitching motility protein PilU                       | Chemotaxis and motility                                                         | -0.763 (1)                                     |                                                |                                                |
| NGO1814                                                           | cell division topological specificity factor MinE                                                 | Cell division                                                                   | -0.586 (2)                                     |                                                |                                                |
| NGO1528                                                           | cell division protein FtsZ                                                                        | Cell division                                                                   |                                                |                                                | -0.951 (2)                                     |
| <b>Energy metabolism</b>                                          |                                                                                                   |                                                                                 |                                                |                                                |                                                |
| NGO0108 <sup>e</sup>                                              | hypothetical protein                                                                              | Electron transport                                                              | -0.942 (1)                                     |                                                |                                                |
| NGO0687                                                           | putative ferredoxin-NADP reductase                                                                | Electron transport                                                              | -0.717 (1)                                     |                                                |                                                |
| NGO2147                                                           | F0F1 ATP synthase subunit delta; F-type H <sup>+</sup> -transporting ATPase subunit delta         | ATP-proton motive force interconversion                                         | -0.635 (1)                                     |                                                |                                                |
| NGO2149                                                           | F0F1 ATP synthase subunit gamma; F-type H <sup>+</sup> -transporting ATPase subunit gamma         | ATP-proton motive force interconversion                                         |                                                | -2.138 (1)                                     |                                                |
| NGO2148                                                           | F0F1 ATP synthase subunit alpha; F-type H <sup>+</sup> -transporting ATPase subunit alpha         | ATP-proton motive force interconversion                                         |                                                | -1.392 (3)                                     | -1.621 (1)                                     |
| NGO0639 <sup>d</sup>                                              | putative L-lactate dehydrogenase; L-lactate dehydrogenase (cytochrome)                            | Anaerobic                                                                       |                                                | -1.096 (3)                                     | -0.849 (3)                                     |
| NGO0565                                                           | AceE; pyruvate dehydrogenase subunit E1                                                           | Pyruvate dehydrogenase                                                          |                                                | -0.875 (3)                                     | -1.178 (3)                                     |
| NGO0913                                                           | SucC; succinyl-CoA synthetase subunit beta                                                        | TCA cycle                                                                       |                                                | -0.767 (1)                                     |                                                |
| NGO0977                                                           | acetate kinase                                                                                    | Fermentation                                                                    |                                                | -0.689 (1)                                     |                                                |
| NGO0917                                                           | SucA; 2-oxoglutarate dehydrogenase E1 component                                                   | TCA cycle                                                                       |                                                | -0.652 (1)                                     |                                                |
| <b>Protein fate</b>                                               |                                                                                                   |                                                                                 |                                                |                                                |                                                |
| NGO1422                                                           | heat shock protein GrpE; molecular chaperone GrpE                                                 | Protein folding and stabilization                                               |                                                | -2.206 (1)                                     |                                                |
| NGO1046                                                           | putative ClpB protein; ATP-dependent Clp protease ATP-binding subunit ClpB                        | Degradation of proteins, peptides, and glycopeptides                            |                                                | -1.798 (1)                                     |                                                |
| NGO0116                                                           | preprotein translocase subunit SecB                                                               | Protein and peptide secretion and trafficking                                   |                                                | -1.572 (1)                                     |                                                |
| NGO2095                                                           | GroEL; chaperonin GroEL                                                                           | Protein folding and stabilization                                               |                                                | -1.528 (3)                                     | -1.875 (2)                                     |
| NGO1429                                                           | DnaK; molecular chaperone DnaK                                                                    | Protein folding and stabilization                                               |                                                | -0.793 (3)                                     | -0.848 (1)                                     |
| <b>Protein synthesis</b>                                          |                                                                                                   |                                                                                 |                                                |                                                |                                                |
| NGO0066                                                           | putative tyrosyl-tRNA synthase                                                                    | tRNA aminoacylation                                                             | -0.764 (1)                                     |                                                |                                                |
| NGO1841                                                           | RpsJ, nusE; 30S ribosomal protein S10                                                             | Ribosomal proteins: synthesis and modification                                  | -0.662 (2)                                     |                                                |                                                |
| NGO0174                                                           | RpsP; 30S ribosomal protein S16                                                                   | Ribosomal proteins: synthesis and modification                                  |                                                | -1.579 (1)                                     |                                                |
| NGO0304                                                           | PheT; phenylalanyl-tRNA synthetase subunit beta                                                   | tRNA aminoacylation                                                             |                                                | -1.434 (1)                                     |                                                |
| NGO1843                                                           | FusA; elongation factor G                                                                         | Translation factors                                                             |                                                | -1.381 (1)                                     |                                                |
| NGO1838                                                           | RplC; 50S ribosomal protein L3                                                                    | Ribosomal proteins: synthesis and modification                                  |                                                | -1.297 (2)                                     |                                                |
| NGO2024                                                           | RplM; 50S ribosomal protein L13                                                                   | Ribosomal proteins: synthesis and modification                                  |                                                | -1.123 (1)                                     |                                                |
| NGO0584                                                           | RplI; 50S ribosomal protein L9                                                                    | Ribosomal proteins: synthesis and modification                                  |                                                | -0.841 (3)                                     |                                                |

|                                                           |                                                      |                                                |            |            |            |
|-----------------------------------------------------------|------------------------------------------------------|------------------------------------------------|------------|------------|------------|
| NGO1854                                                   | RplA; 50S ribosomal protein L1                       | Ribosomal proteins: synthesis and modification |            | -0.731 (2) |            |
| NGO0295                                                   | ThrS; threonyl-tRNA synthetase                       | tRNA aminoacylation                            |            | -0.658 (1) |            |
| NGO18231 <sup>f</sup>                                     | RpmD; 50S ribosomal protein L30                      | Ribosomal proteins: synthesis and modification |            | -0.592 (1) |            |
| NGO0604                                                   | RpsA; 30S ribosomal protein S1                       | Ribosomal proteins: synthesis and modification |            |            | -0.930 (1) |
| NGO0442                                                   | 50S ribosomal protein L25/general stress protein Ctc | Ribosomal proteins: synthesis and modification |            |            | -0.913 (1) |
| NGO0297                                                   | RpmI; 50S ribosomal protein L35                      | Ribosomal proteins: synthesis and modification |            |            | -0.885 (1) |
| NGO18311 <sup>g</sup>                                     | RplP; 50S ribosomal protein L16                      | Ribosomal proteins: synthesis and modification |            |            | -0.756 (1) |
| NGO1677                                                   | RpmA; 50S ribosomal protein L27                      | Ribosomal proteins: synthesis and modification |            |            | -0.619 (1) |
| <b>Purines, pyrimidines, nucleosides, and nucleotides</b> |                                                      |                                                |            |            |            |
| NGO0029                                                   | PyrE; orotate phosphoribosyltransferase              | Pyrimidine ribonucleotide biosynthesis         | -0.608 (1) |            |            |
| NGO0441                                                   | ribose-phosphate pyrophosphokinase                   | Purine ribonucleotide biosynthesis             | -0.602 (3) |            |            |
| NGO0048                                                   | CarB; carbamoyl phosphate synthase large subunit     | Pyrimidine ribonucleotide biosynthesis         |            | -0.906 (1) |            |
| <b>Regulatory functions</b>                               |                                                      |                                                |            |            |            |
| NGO0803 <sup>h</sup>                                      | putative GTP-binding protein                         | Other                                          | -0.714 (1) |            |            |
| <b>Transcription</b>                                      |                                                      |                                                |            |            |            |
| NGO1785                                                   | Rne; ribonuclease E                                  | RNA processing                                 |            | -0.623 (1) |            |
| NGO1856 <sup>i</sup>                                      | NusG; transcription antitermination protein NusG     | Transcription factors                          |            |            | -0.763 (1) |
| <b>Transport and binding proteins</b>                     |                                                      |                                                |            |            |            |
| NGO2093                                                   | FetA; iron complex outer membrane receptor protein   | Cations and iron carrying compounds            | -2.447 (1) | -2.440 (2) | -2.008 (3) |
| NGO1935                                                   | EtfB; electron transfer flavoprotein beta subunit    | Cations and iron carrying compounds            | -0.954 (1) |            |            |
| NGO0764                                                   | putative ABC-transporter, ATP-binding protein        | Cations and iron carrying compounds            | -0.766 (1) |            |            |
| NGO1496 <sup>j</sup>                                      | TbpB; transferrin-binding protein B                  | Cations and iron carrying compounds            |            | -2.418 (2) |            |
| NGO1495                                                   | TbpA; transferrin-binding protein A                  | Cations and iron carrying compounds            |            | -0.680 (1) | -1.623 (2) |
| NGO1378                                                   | ExbB; biopolymer transport protein ExbB              | Unknown substrate                              |            |            | -0.951 (1) |

<sup>a</sup> Functional role assignments (both main and JCVI sub-roles) for the *N. gonorrhoeae* proteins were downloaded from the JCVI-CMR website (<http://cmr.jcvi.org/tigr-scripts/CMR/CmrHomePage.cgi>).

<sup>b</sup> Average log<sub>2</sub> values for biofilm/planktonic protein ratios. Values given in red meet the 2-fold cutoff threshold (log<sub>2</sub> values ≤ -1.000).

<sup>c</sup> (N) represents the number of measurements (biological replicates) averaged.

<sup>d</sup> Proteins with more than one functional role assignment provided (alternate Main role/JCVI sub-role): NGO0346, Cellular processes/Chemotaxis and motility; NGO0639, Energy metabolism/Glycolysis/gluconeogenesis.

<sup>e</sup> NGO0108 tentatively reclassified based on orthology to *N. meningitidis* NMB1796 (99.4% identity), NMCC\_0432 (98.8% identity), and NMC0426 (98.8% identity).

<sup>f</sup> NGO18231 tentatively reclassified based on orthology to *N. meningitidis* NMCC\_1989 (98.4% identity), NMC0150 (98.4% identity), and NMB0160 (98.4% identity).

<sup>g</sup> NGO18311 tentatively reclassified based on orthology to *N. meningitidis* NMCC\_1998 (100% identity), NMC0139 (100% identity), NMB0149 (100% identity), and NMA0122 (100% identity).

<sup>h</sup> NGO0803 tentatively reclassified based on orthology to *N. meningitidis* NMC1099 (99.7% identity) and NMCC\_1078 (99.5% identity). Possible alternate Main role/JCVI sub-role assignments for this protein include: Cellular processes/Adaptations to atypical conditions (NMC1099 and NMCC\_1078) and Protein synthesis/Translation factors (NMC1099 and NMCC\_1078).

<sup>i</sup> NGO1856 tentatively reclassified based on orthology to *N. meningitidis* NMB0126 (100% identity) and NMCC\_2018 (99.3% identity).

<sup>j</sup> NGO1496 tentatively reclassified based on orthology to *N. meningitidis* NMA2025 (72.3% identity), NMB0460 (62.2% identity), NMCC\_1682 (57.4% identity) and NMC1691 (41.2% identity).
