# Supplementary material for: Proteomic Analysis of Neisseria gonorrhoeae Biofilms Shows Shift to Anaerobic Respiration and Changes in Nutrient Transport and Outermembrane Proteins
Source: PubMed Central journal article supplement (PMC3368942; doi:10.1371/journal.pone.0038303), 2012-06-06
Supplement: pone.0038303.s011.pdf [file pone.0038303.s011.pdf]

**Supplementary Table S7. Variable proteins in *N. gonorrhoeae* biofilms listed by functional roles<sup>a</sup>: Biofilm/Planktonic ratios expressed as log<sub>2</sub> values, 1.5-fold cutoff threshold (log<sub>2</sub> values either ≥ 0.585 or ≤ -0.585), p-values <0.05**

| Accession                                                 | Name                                                                                                             | JCVI sub-role                                                                   | Extract 1<br>Avg <sup>b</sup> (N) <sup>c</sup> | Extract 2<br>Avg <sup>b</sup> (N) <sup>c</sup> | Extract 3<br>Avg <sup>b</sup> (N) <sup>c</sup> |
|-----------------------------------------------------------|------------------------------------------------------------------------------------------------------------------|---------------------------------------------------------------------------------|------------------------------------------------|------------------------------------------------|------------------------------------------------|
| <b>Amino acid biosynthesis</b>                            |                                                                                                                  |                                                                                 |                                                |                                                |                                                |
| NGO1358                                                   | glutamate dehydrogenase                                                                                          | Glutamate family                                                                | 0.888 (3)                                      | -0.947 (2)                                     | -1.726 (2)                                     |
| <b>Cell envelope</b>                                      |                                                                                                                  |                                                                                 |                                                |                                                |                                                |
| NGO0332                                                   | putative reductase; dTDP-4-dehydrorhamnose reductase                                                             | Biosynthesis and degradation of surface polysaccharides and lipopolysaccharides | -0.807 (1)                                     | 0.856 (1)                                      |                                                |
| NGO1056                                                   | hypothetical protein; lipoprotein NlpD                                                                           | Other                                                                           |                                                | -1.151 (1)                                     | 0.954 (3)                                      |
| <b>Cellular processes</b>                                 |                                                                                                                  |                                                                                 |                                                |                                                |                                                |
| NGO0328 <sup>e</sup>                                      | hypothetical protein; peroxiredoxin Q/BCP                                                                        | Detoxification                                                                  | -0.681 (1)                                     | 0.614 (1)                                      |                                                |
| NGO0926                                                   | putative peroxiredoxin family protein/glutaredoxin                                                               | Detoxification                                                                  |                                                | 0.610 (1)                                      | -0.655 (1)                                     |
| <b>Energy metabolism</b>                                  |                                                                                                                  |                                                                                 |                                                |                                                |                                                |
| NGO0617                                                   | Eno; phosphopyruvate hydratase; enolase                                                                          | Glycolysis/gluconeogenesis                                                      | 1.120 (3)                                      | -0.900 (2)                                     | -1.812 (1)                                     |
| NGO0562                                                   | putative dihydrolipoamide dehydrogenase                                                                          | Pyruvate dehydrogenase                                                          | 0.996 (3)                                      | -0.731 (3)                                     | -1.142 (2)                                     |
| NGO0915                                                   | dihydrolipoamide dehydrogenase                                                                                   | Pyruvate dehydrogenase                                                          | 0.841 (3)                                      | -0.967 (2)                                     |                                                |
| NGO2150                                                   | F <sub>0</sub> F <sub>1</sub> ATP synthase subunit beta; F-type H <sup>+</sup> -transporting ATPase subunit beta | ATP-proton motive force interconversion                                         | 0.826 (1)                                      | -1.543 (2)                                     | -1.719 (1)                                     |
| NGO0916                                                   | dihydrolipoamide succinyltransferase                                                                             | TCA cycle                                                                       | 0.754 (1)                                      |                                                | -2.314 (1)                                     |
| NGO0217                                                   | ABC transporter, periplasmic binding protein, iron related; iron(III) transport system substrate-binding protein | Electron transport                                                              | 0.618 (2)                                      | -1.657 (3)                                     | -0.958 (3)                                     |
| NGO0200                                                   | phosphoenolpyruvate synthase                                                                                     | Glycolysis/gluconeogenesis                                                      | 0.598 (3)                                      | -1.351 (1)                                     | -1.403 (1)                                     |
| <b>Protein synthesis</b>                                  |                                                                                                                  |                                                                                 |                                                |                                                |                                                |
| NGO1853                                                   | RplJ; 50S ribosomal protein L10                                                                                  | Ribosomal proteins: synthesis and modification                                  | 0.648 (1)                                      |                                                | -1.213 (1)                                     |
| NGO2134                                                   | RpsU; 30S ribosomal protein S21                                                                                  | Ribosomal proteins: synthesis and modification                                  | 0.592 (1)                                      |                                                | -0.852 (1)                                     |
| NGO1825 <sup>f</sup>                                      | RplF; 50S ribosomal protein L6                                                                                   | Ribosomal proteins: synthesis and modification                                  |                                                | -0.701 (1)                                     | 0.799 (2)                                      |
| NGO1824 <sup>g</sup>                                      | RpsE; 30S ribosomal protein S5                                                                                   | Ribosomal proteins: synthesis and modification                                  |                                                | -1.000 (1)                                     | 0.586 (1)                                      |
| <b>Purines, pyrimidines, nucleosides, and nucleotides</b> |                                                                                                                  |                                                                                 |                                                |                                                |                                                |
| NGO0799                                                   | inosine 5'-monophosphate dehydrogenase                                                                           | Purine ribonucleotide biosynthesis                                              | 1.180 (3)                                      | -0.716 (2)                                     |                                                |
| NGO0614                                                   | ribonucleotide-diphosphate reductase subunit alpha                                                               | 2'-Deoxyribonucleotide metabolism                                               | -0.656 (1)                                     | 1.086 (1)                                      |                                                |
| <b>Regulatory functions</b>                               |                                                                                                                  |                                                                                 |                                                |                                                |                                                |
| NGO0460 <sup>d</sup>                                      | succinyldiaminopimelate transaminase; acetylornithine/N-succinyldiaminopimelate aminotransferase                 | Other                                                                           | -0.622 (1)                                     | 0.681 (1)                                      |                                                |
| <b>Transcription</b>                                      |                                                                                                                  |                                                                                 |                                                |                                                |                                                |
| NGO0335                                                   | polynucleotide phosphorylase/polyadenylase; polyribonucleotide nucleotidyltransferase                            | Degradation of RNA                                                              | 0.981 (3)                                      | -1.093 (3)                                     |                                                |
| NGO1850                                                   | DNA-directed RNA polymerase subunit beta'                                                                        | DNA-dependent RNA polymerase                                                    | 0.805 (3)                                      | -0.770 (1)                                     | -0.595 (2)                                     |
| NGO1851                                                   | RpoB; DNA-directed RNA polymerase subunit beta                                                                   | DNA-dependent RNA polymerase                                                    | 0.735 (3)                                      | -1.045 (2)                                     | -0.892 (2)                                     |
| NGO1818                                                   | DNA-directed RNA polymerase subunit alpha                                                                        | DNA-dependent RNA polymerase                                                    | 0.585 (3)                                      | -1.063 (3)                                     |                                                |
| <b>Transport and binding proteins</b>                     |                                                                                                                  |                                                                                 |                                                |                                                |                                                |
| NGO1494                                                   | putative ABC transporter, periplasmic binding protein, polyamine                                                 | Amino acids, peptides and amines                                                | 1.287 (3)                                      |                                                | -0.970 (1)                                     |
| NGO1656 <sup>h</sup>                                      | hypothetical protein                                                                                             | Unknown substrate                                                               | 0.760 (1)                                      | -1.094 (1)                                     |                                                |

<sup>a</sup> Functional role assignments (both main and JCVI sub-roles) for the *N. gonorrhoeae* proteins were downloaded from the JCVI-CMR website (<http://cmr.icvi.org/tigr-scripts/CMR/CmrHomePage.cgi>).

<sup>b</sup> Average log<sub>2</sub> values for biofilm/planktonic protein ratios. Values given in red meet the 2-fold cutoff threshold (log<sub>2</sub> values either ≥ 1.000 or ≤ -1.000).

<sup>c</sup> (N) represents the number of measurements (biological replicates) averaged.

<sup>d</sup> Proteins with more than one functional role assignment provided (alternate Main role/JCVI sub-role): NGO0460, Unknown function/Enzymes of unknown specificity.

<sup>e</sup> NGO0328 tentatively reclassified based on orthology to *N. meningitidis* NMCC\_0714 (97.9% identity).

<sup>f</sup> NGO1825 tentatively reclassified based on orthology to *N. meningitidis* NMCC\_1992 (97.7% identity), NMC0147 (97.7% identity), and NMB0157 (97.7% identity).

<sup>g</sup> NGO1824 tentatively reclassified based on orthology to *N. meningitidis* NMB0159 (100% identity) and NMA0112 (100% identity).

<sup>h</sup> NGO1656 tentatively reclassified based on orthology to *N. meningitidis* NMCC\_1797 (98.6% identity). Possible alternate Main role/JCVI sub-role assignments for this protein include: Transport and binding proteins/Amino acids, peptides and amines (NMCC\_1797) and Cell envelope/Other (NMB0345, 98.6% identity).
